# Supplementary material
Source: publisher figshare collection journal article supplement (https://sage.figshare.com/ndownloader/files/16587881)
Supplement: Supplementary file 1 [file 16587881]

## Supplementary Material

### *Analysis of Combined Service Records and Visitor Surveys*

We calculated the number of times GameSense Advisors engaged in each of five major categories of activities that span the continuum of needs from primary to tertiary prevention: (1) Providing information about responsible gambling, (2) Providing information about PlayMyWay, (3) Providing information about voluntary self-exclusion, (4) Enrolling visitors in voluntary self-exclusion, and (5) Referring visitors to professional treatment or self-help. We estimated the proportion of times they provided these 5 services as a function of (a) all the interactions they had ( $N = 5,659$ ) and (b) all the non-Simple interactions they had ( $n = 1,719$ ). Advisors provided information and tools about responsible gambling during 92.8% of non-Simple interactions and 28.1% of all interactions. They provided harm reduction tools less often: they mentioned PlayMyWay in 20.2% of all non-Simple interactions and 6.1% of all interactions. Advisors discussed voluntary self-exclusion within 9.6% of all non-Simple interactions and 2.9% of all interactions, and they enrolled visitors in voluntary self-exclusion during 3.2% of all non-Simple interactions and 1.0% of all interactions. Finally, they provided referrals to professional treatment/the gambling helpline/self-help within 7.3% of non-Simple interactions and 2.2% of all interactions (see Supplementary Figure 1).<sup>1</sup>

---

<sup>1</sup>These estimates are based on a total of 5,659 total interactions. By definition, Advisors performed none of these activities during the 3,946 Simple interactions. Their reports indicate that within the 735 Instructive interactions, they provided responsible gambling information 690 times, provided information about PlayMyWay 119 times, discussed voluntary self-exclusion 75 times, and provided referrals to self-help/the gambling hotline/professional treatment 14 times. By definition, they provided responsible gambling information during all 70 Demonstration interactions and performed no other activities during these interactions. Finally, we relied on visitors' reports to estimate Advisors' activities within the 908 Exchange interactions. We extrapolated from data presented in Table 2 to estimate that Advisors provided responsible gambling information 830 times, provided information about PlayMyWay 227 times, discussed voluntary self-exclusion 36 times, and provided referrals 57 times. Internal records reveal that Advisors enrolled visitors in voluntary self-exclusion 54 times, and they were instructed to discuss the program and provide a packet of referrals each time. Additional details about these estimates are available from the authors.

Supplementary Figure 1. Percent of interactions according to five major categories of GameSense Advisor activities.

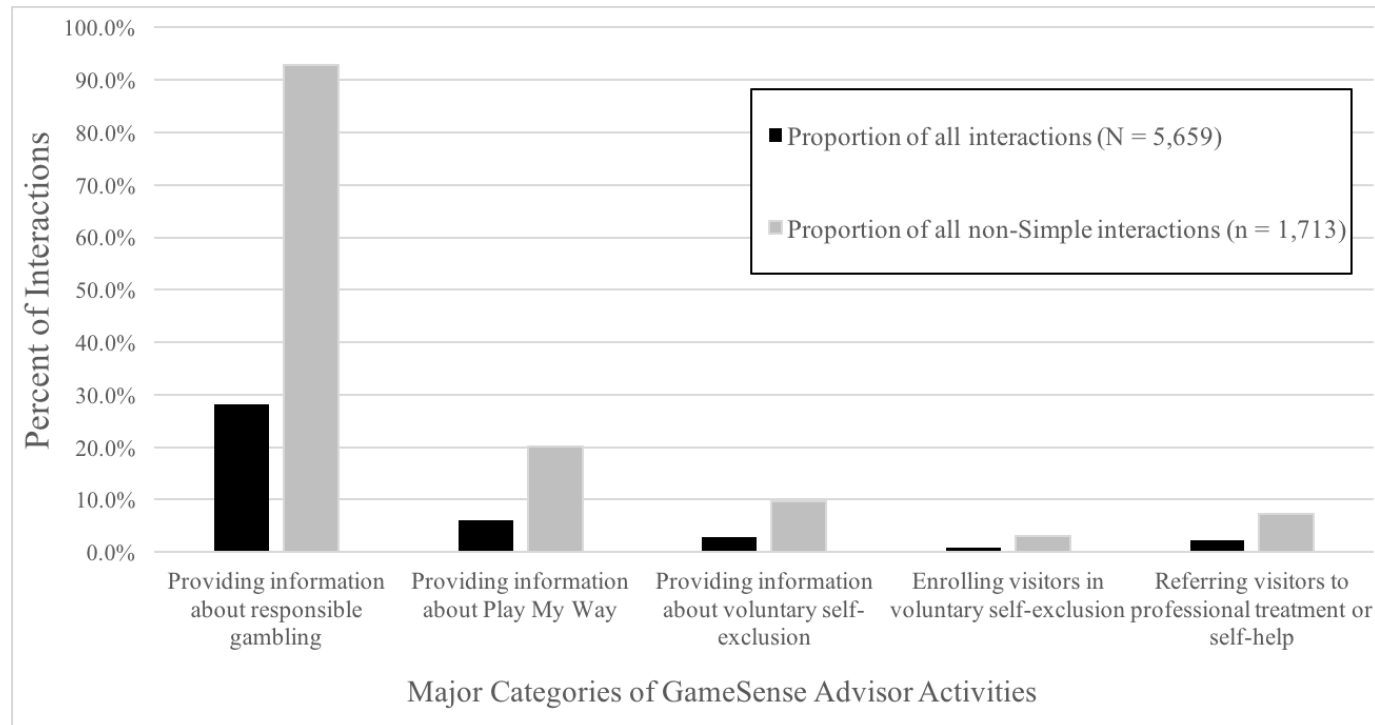

### ***Institutional and Individual Funding Sources***

The Division on Addiction currently receives funding from DraftKings, The Foundation for Advancing Alcohol Responsibility (FAAR), The Healing Lodge of the Seven Nations via the Indian Health Service with funds approved by National Institute of General Medical Sciences, National Institutes of Health; The Integrated Centre on Addiction Prevention and Treatment of the Tung Wah Group of Hospitals; the Gavin Foundation via the Substance Abuse and Mental Health Services Administration (SAMHSA); University of Nevada, Las Vegas via MGM Resorts International; the Massachusetts Department of Public Health, Bureau of Substance Addiction Services, and GVC Holdings, PLC.

During the past 5 years, the Division on Addiction has received funding from Aarhus University Hospital with funds approved by The Danish Council for Independent Research; ABMRF – The Foundation for Alcohol Research; bwin.party Digital Entertainment; Caesars Enterprise Services, LLC; Cambridge Police Department with funds approved by the Office of Juvenile Justice Delinquency Prevention; the David H. Bor Library Fund, Cambridge Health Alliance; DraftKings; FAAR, Heineken USA, Inc.; Fenway Community Health Center, Inc.; The Healing Lodge of the Seven Nations via the Indian Health Service with funds approved by the the US National Institute of General Medical Sciences, US National Institutes of Health; the Gavin Foundation via the US Substance Abuse and Mental Health Services Administration (SAMHSA); the Massachusetts Council on Compulsive Gambling; the University of Nevada, Las Vegas via MGM Resorts International; the Massachusetts Department of Public Health, Bureau of Substance Addiction Services; the Massachusetts Gaming Commission, Commonwealth of Massachusetts; the National Center for Responsible Gaming (USA), the Tung Wah Group of Hospitals, Hong Kong, and the Worcester House of Correction.

Heather Gray, Debi LaPlante, and Howard Shaffer have received course royalty fees from the Harvard Medical School Department of Continuing Education. Heather Gray has served as a paid program evaluator for Duffy Health Center; has served as a paid grant reviewer for the NCRG; has received travel funds from the Tung Wah Group of Hospitals/The Hong Kong Jockey Club Charities Trust; has received honoraria funds for preparation of a book chapter from Université Laval; and has received travel funds and honoraria from the National Center for Responsible Gaming (USA). Heather Gray and Debi LaPlante are non-paid members of the Board of Directors of the New Hampshire Council on Problem Gambling.

Debi LaPlante has received travel funds from the University of Nevada, Las Vegas; the National Center for Responsible Gaming (USA); the US National Collegiate Athletic Association and the British Columbia Lottery Corp. for conference presentations; royalty funds from the American Psychological Association and Harvard Health Publications; honoraria funds for preparation of a book chapter from Université Laval; grant review and think tank participation funds from the National Center for Responsible Gaming (USA).

Howard Shaffer has received funding from the Dunes of Easthampton, a residential addiction treatment programme, for serving as a consultant. He has received reimbursement from Université Laval for travel expenses related to research, but no honorarium. He has received consulting funds from Harvard Medical School for authoring articles for the Harvard Health Blog. Howard Shaffer also has received funding for consultation from the American

Psychological Association, the Las Vegas Sands Corp., Davies Ward Phillips & Vineberg, LLP, Winston & Strawn LLP and Freshfields Bruckhaus Deringer, LLP.
